# Supplementary material
Source: publisher figshare collection journal article supplement (https://sage.figshare.com/ndownloader/files/13193108)

Supplemental figure 1

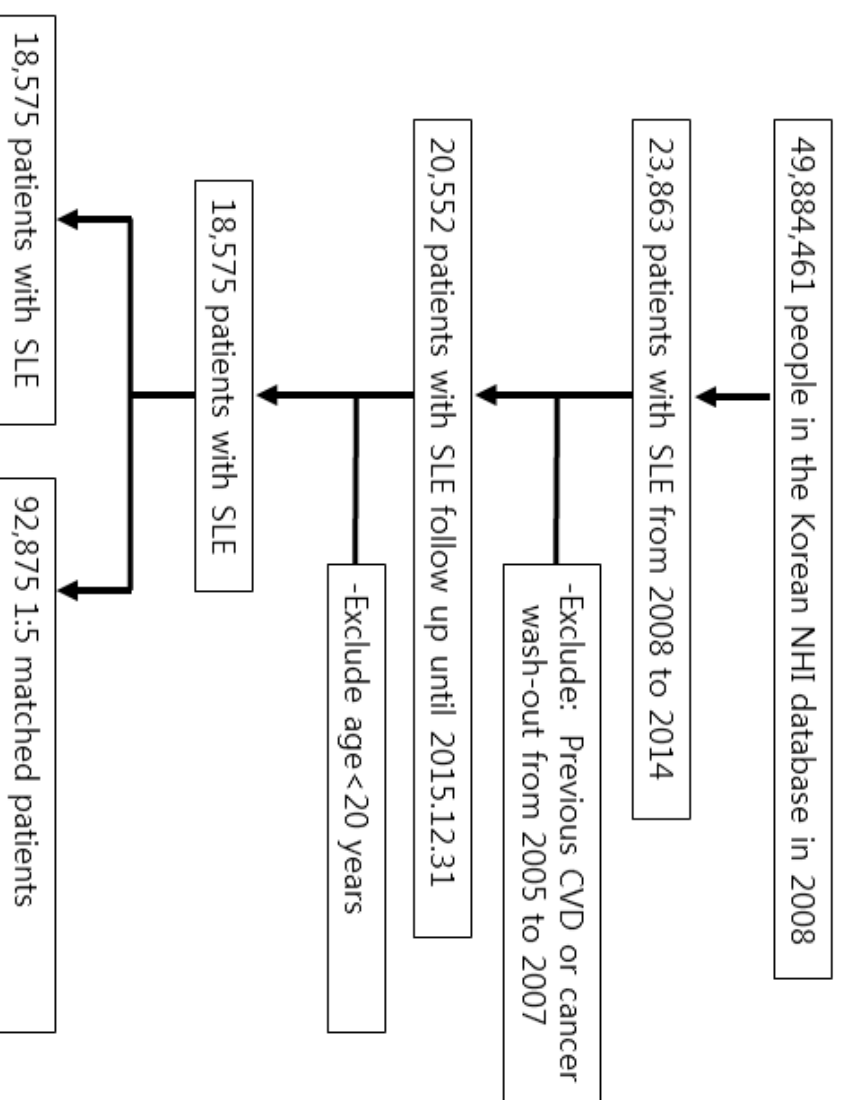

Supplement: Supplementary file 1 [file 13193108]
